# Supplementary material for: Clinically Relevant Mutations of Mycobacterial GatCAB Inform Regulation of Translational Fidelity
Source: PubMed Central journal article supplement (PMC8406222; doi:10.1128/mbio.01100-21), 2021-07-06
Supplement: mbio.01100-21-sf001.pdf [file mbio.01100-21-sf001.pdf]

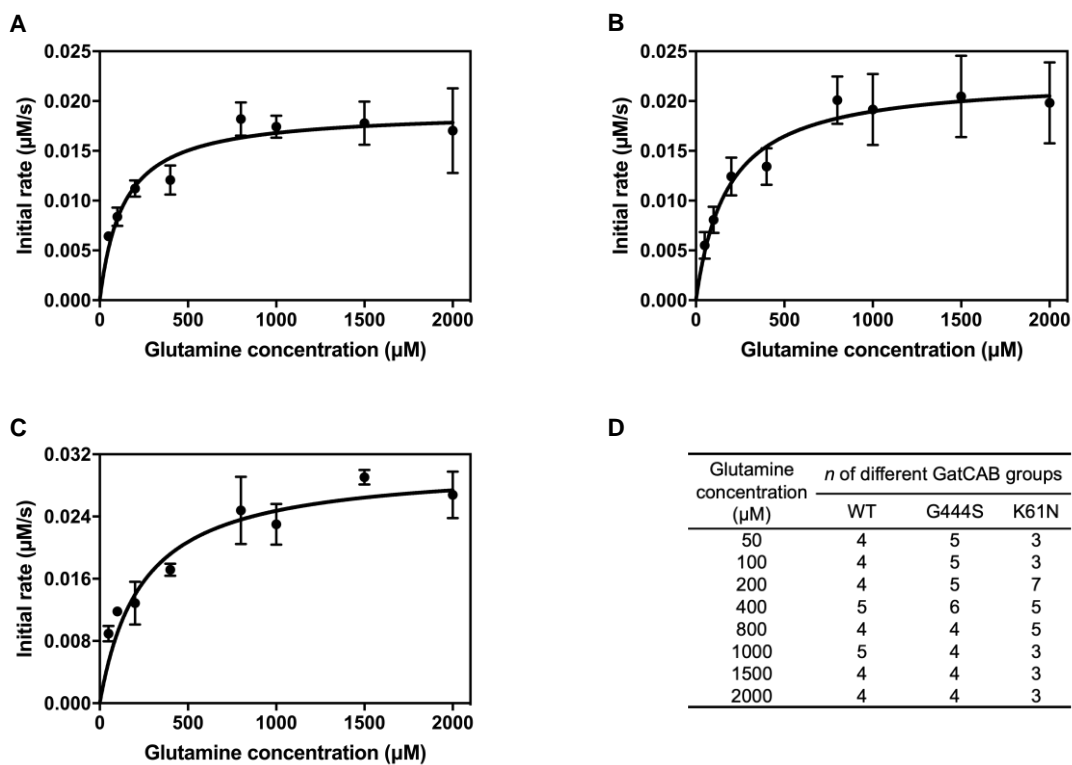

**Supplementary Figure 1. Glutaminase assay of WT, G444S and K61N *M. tuberculosis* GatCAB.** Michaelis-Menten curves of (A) WT (B) G444S and (C) K61N GatCAB glutaminase activity. Reactions were carried with 5  $\mu\text{M}$  Asp-tRNA<sup>Asn</sup>, containing ~20 nM GatCAB. GraphPad Prism was used to calculate kinetic parameters by nonlinear regression. Error bars represent the standard deviation of independent biological replicates, the *n* of which are listed in (D).
