# Supplementary material for: Clinically Relevant Mutations of Mycobacterial GatCAB Inform Regulation of Translational Fidelity
Source: PubMed Central journal article supplement (PMC8406222; doi:10.1128/mbio.01100-21), 2021-07-06
Supplement: mbio.01100-21-sf002.pdf [file mbio.01100-21-sf002.pdf]

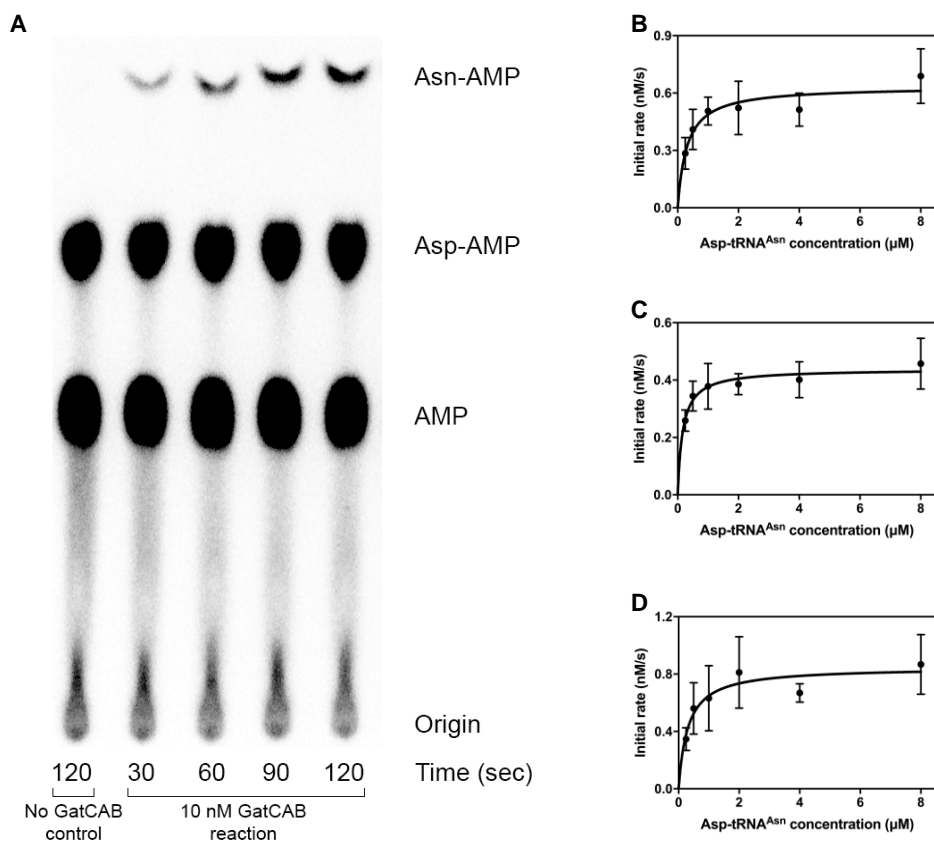

**Supplementary Figure 2. GatCAB amidotransferase assay with <sup>32</sup>P-labeled tRNA.**

(A) Representative phosphorimage of the separation of Asn-[ $\alpha$ -<sup>32</sup>P]AMP, Asp-[ $\alpha$ -<sup>32</sup>P]AMP, [ $\alpha$ -<sup>32</sup>P]AMP, by PEI cellulose chromatography. Aliquots (5  $\mu$ L) of the amidotransferase reaction at 37  $^{\circ}$ C (10 nM GatCAB from *M. tuberculosis*, 0.5  $\mu$ M Asp-tRNA<sup>Asn</sup>, 1 mM Gln, 4 mM ATP, 25 mM KCl, 8 mM MgCl<sub>2</sub>, 40 mM HEPES-KOH pH 7.5) were taken at the time points indicated and quenched / digested at 37  $^{\circ}$ C with 5  $\mu$ L of 100 mM sodium citrate pH 4.7, and 0.66 mg/mL of nuclease P1. Digested samples (3  $\mu$ L) were then spotted onto a 20  $\times$  20 cm PEI-cellulose glass plate, which was developed in 10 mM ammonium chloride, 5% acetic acid for  $\sim$ 2 hours. Aliquot from no GatCAB reaction at 120 seconds was taken as the background control. Michaelis-Menten curves of WT ( $n = 4$ ) (B), G444S ( $n = 4$ ) (C) and K61N ( $n = 3$ ) (D) GatCAB are shown for their amidotransferase activity. GraphPad Prism was used to calculate kinetic parameters by nonlinear regression. Error bars represent the standard deviation of independent biological replicates.
