# Supplementary material for: Clinically Relevant Mutations of Mycobacterial GatCAB Inform Regulation of Translational Fidelity
Source: PubMed Central journal article supplement (PMC8406222; doi:10.1128/mbio.01100-21), 2021-07-06
Supplement: mbio.01100-21-sf004.pdf [file mbio.01100-21-sf004.pdf]

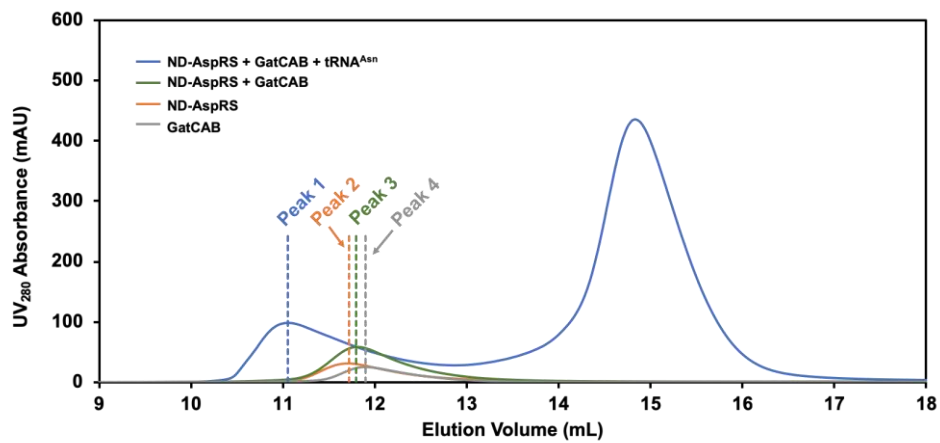

**Supplementary Figure 4. Formation of the *M. tuberculosis* Asn-transamidosome is tRNA-dependent.** Gel filtration conducted with free ND-AspRS, free GatCAB, a mixture of ND-AspRS and GatCAB, and a mixture of ND-AspRS, GatCAB and tRNA<sup>Asn</sup>. 4  $\mu$ M ND-AspRS, 2  $\mu$ M WT GatCAB and 2  $\mu$ M tRNA<sup>Asn</sup> were used.
